# Supplementary material
Source: publisher figshare collection journal article supplement (https://acs.figshare.com/ndownloader/files/3736303)
Supplement: Supplementary file 1 [file 3736303]

 
data_exp_434 
 
_audit_creation_method            SHELXL-97 
_chemical_name_systematic 
; 
 ? 
; 
_chemical_name_common             ? 
_chemical_melting_point           ? 
_chemical_formula_moiety           'C22 H16 O4'
_chemical_formula_sum 
 'C22 H16 O4' 
_chemical_formula_weight          344.35
 
loop_ 
 _atom_type_symbol 
 _atom_type_description 
 _atom_type_scat_dispersion_real 
 _atom_type_scat_dispersion_imag 
 _atom_type_scat_source 
 'C'  'C'   0.0033   0.0016 
 'International Tables Vol C Tables 4.2.6.8 and 6.1.1.4' 
 'H'  'H'   0.0000   0.0000 
 'International Tables Vol C Tables 4.2.6.8 and 6.1.1.4' 
 'O'  'O'   0.0106   0.0060 
 'International Tables Vol C Tables 4.2.6.8 and 6.1.1.4' 
 
_symmetry_cell_setting            'orthorhombic'
_symmetry_space_group_name_H-M    'P n a 21'
 
loop_ 
 _symmetry_equiv_pos_as_xyz 
 'x, y, z' 
 '-x, -y, z+1/2' 
 '-x+1/2, y+1/2, z+1/2' 
 'x+1/2, -y+1/2, z' 
 
_cell_length_a                    23.0883(10) 
_cell_length_b                    8.2485(4) 
_cell_length_c                    17.6035(8) 
_cell_angle_alpha                 90.00 
_cell_angle_beta                  90.00 
_cell_angle_gamma                 90.00 
_cell_volume                      3352.5(3) 
_cell_formula_units_Z             8 
_cell_measurement_temperature     293(2) 
_cell_measurement_reflns_used     ? 
_cell_measurement_theta_min       ? 
_cell_measurement_theta_max       ? 
 
_exptl_crystal_description        'plate' 
_exptl_crystal_colour             'orange'
_exptl_crystal_size_max           0.29 
_exptl_crystal_size_mid           0.26
_exptl_crystal_size_min           0.21
_exptl_crystal_density_meas       ? 
_exptl_crystal_density_diffrn     1.303 
_exptl_crystal_density_method     'not measured' 
_exptl_crystal_F_000              1440 
_exptl_absorpt_coefficient_mu     0.094 
_exptl_absorpt_correction_type    ? 
_exptl_absorpt_correction_T_min   ? 
_exptl_absorpt_correction_T_max   ? 
_exptl_absorpt_process_details    ? 
 
_exptl_special_details 
; 
 ? 
; 
 
_diffrn_ambient_temperature       293(2) 
_diffrn_radiation_wavelength      0.71073 
_diffrn_radiation_type            MoK\a 
_diffrn_radiation_source          'fine-focus sealed tube' 
_diffrn_radiation_monochromator   graphite 
_diffrn_measurement_device_type   'Xcalibur, Eos, Gemini'
_diffrn_measurement_method        '\w scans'
_diffrn_detector_area_resol_mean  ? 
_diffrn_standards_number          ? 
_diffrn_standards_interval_count  ? 
_diffrn_standards_interval_time   ? 
_diffrn_standards_decay_%         ? 
_diffrn_reflns_number             19835 
_diffrn_reflns_av_R_equivalents   0.0318 
_diffrn_reflns_av_sigmaI/netI     0.0390 
_diffrn_reflns_limit_h_min        -29 
_diffrn_reflns_limit_h_max        30 
_diffrn_reflns_limit_k_min        -11 
_diffrn_reflns_limit_k_max        10 
_diffrn_reflns_limit_l_min        -23 
_diffrn_reflns_limit_l_max        23 
_diffrn_reflns_theta_min          3.25 
_diffrn_reflns_theta_max          29.03 
_reflns_number_total              8951 
_reflns_number_gt                 5527 
_reflns_threshold_expression      >2sigma(I) 
 
_computing_data_collection        ? 
_computing_cell_refinement        ? 
_computing_data_reduction         ? 
_computing_structure_solution     'SHELXS-97 (Sheldrick, 1990)' 
_computing_structure_refinement   'SHELXL-97 (Sheldrick, 1997)' 
_computing_molecular_graphics     ? 
_computing_publication_material   ? 
 
_refine_special_details 
; 
 Refinement of F^2^ against ALL reflections.  The weighted R-factor wR and 
 goodness of fit S are based on F^2^, conventional R-factors R are based 
 on F, with F set to zero for negative F^2^. The threshold expression of 
 F^2^ > 2sigma(F^2^) is used only for calculating R-factors(gt) etc. and is 
 not relevant to the choice of reflections for refinement.  R-factors based 
 on F^2^ are statistically about twice as large as those based on F, and R- 
 factors based on ALL data will be even larger. 
; 
 
_refine_ls_structure_factor_coef  Fsqd  
_refine_ls_matrix_type            full 
_refine_ls_weighting_scheme       calc  
_refine_ls_weighting_details 
 'calc w=1/[\s^2^(Fo^2^)+(0.0427P)^2^+0.6152P] where P=(Fo^2^+2Fc^2^)/3' 
_atom_sites_solution_primary      direct 
_atom_sites_solution_secondary    difmap 
_atom_sites_solution_hydrogens    geom 
_refine_ls_hydrogen_treatment     mixed 
_refine_ls_extinction_method      none 
_refine_ls_extinction_coef        ? 
_refine_ls_abs_structure_details 
 'Flack H D (1983), Acta Cryst. A39, 876-881' 
_refine_ls_abs_structure_Flack    0.3(9) 
_refine_ls_number_reflns          7464 
_refine_ls_number_parameters      473 
_refine_ls_number_restraints      37 
_refine_ls_R_factor_all           0.0788 
_refine_ls_R_factor_gt            0.0533 
_refine_ls_wR_factor_ref          0.1179 
_refine_ls_wR_factor_gt           0.1055 
_refine_ls_goodness_of_fit_ref    1.034 
_refine_ls_restrained_S_all       1.034 
_refine_ls_shift/su_max           0.042 
_refine_ls_shift/su_mean          0.001 
 
loop_ 
 _atom_site_label 
 _atom_site_type_symbol 
 _atom_site_fract_x 
 _atom_site_fract_y 
 _atom_site_fract_z 
 _atom_site_U_iso_or_equiv 
 _atom_site_adp_type 
 _atom_site_occupancy 
 _atom_site_symmetry_multiplicity 
 _atom_site_calc_flag 
 _atom_site_refinement_flags 
 _atom_site_disorder_assembly 
 _atom_site_disorder_group 
O24 O 0.17922(6) 0.11737(19) 0.48636(10) 0.0448(4) Uani 1 1 d . . . 
O22 O 0.08762(7) 0.2023(2) 0.45717(10) 0.0489(4) Uani 1 1 d . . . 
C11 C 0.15566(9) 0.4034(3) 0.47895(13) 0.0380(5) Uani 1 1 d . . . 
O2 O 0.24527(9) 0.6176(2) 0.34599(11) 0.0607(5) Uani 1 1 d . . . 
C13 C 0.21373(9) 0.3535(3) 0.34548(13) 0.0391(5) Uani 1 1 d . . . 
O26 O 0.11996(9) 0.0858(3) 0.61709(12) 0.0718(6) Uani 1 1 d . . . 
C6 C 0.14042(10) 0.5320(3) 0.52674(14) 0.0465(6) Uani 1 1 d . . . 
C14 C 0.20833(10) 0.2017(3) 0.30620(13) 0.0415(5) Uani 1 1 d . . . 
C3 C 0.20863(11) 0.5982(3) 0.40579(15) 0.0490(6) Uani 1 1 d . . . 
C12 C 0.18845(9) 0.4368(3) 0.41289(13) 0.0393(5) Uani 1 1 d . . . 
C10 C 0.13667(9) 0.2343(3) 0.50189(13) 0.0403(5) Uani 1 1 d . . . 
C7 C 0.10553(11) 0.5039(4) 0.59478(15) 0.0581(8) Uani 1 1 d . . . 
H7 H 0.0911 0.5938 0.6205 0.070 Uiso 1 1 calc R . . 
C4 C 0.19377(13) 0.7245(3) 0.45149(17) 0.0590(7) Uani 1 1 d . . . 
H4 H 0.2074 0.8288 0.4423 0.071 Uiso 1 1 calc R . . 
C15 C 0.16750(11) 0.0794(3) 0.32229(15) 0.0485(6) Uani 1 1 d . . . 
H15 H 0.1418 0.0941 0.3624 0.058 Uiso 1 1 calc R . . 
C21 C 0.28294(13) 0.4472(4) 0.24759(17) 0.0686(8) Uani 1 1 d . . . 
H21 H 0.3062 0.5301 0.2289 0.082 Uiso 1 1 calc R . . 
C9 C 0.11714(10) 0.2173(4) 0.58622(15) 0.0526(7) Uani 1 1 d . . . 
C17 C 0.20230(15) -0.0877(4) 0.22057(17) 0.0672(8) Uani 1 1 d . . . 
H17 H 0.2011 -0.1852 0.1941 0.081 Uiso 1 1 calc R . . 
C8 C 0.09319(12) 0.3590(4) 0.62202(16) 0.0604(8) Uani 1 1 d . . . 
H8 H 0.0691 0.3486 0.6641 0.073 Uiso 1 1 calc R . . 
C1 C 0.24823(11) 0.4701(3) 0.31099(15) 0.0512(6) Uani 1 1 d . . . 
C20 C 0.28168(13) 0.3004(4) 0.21413(16) 0.0675(8) Uani 1 1 d . . . 
H20 H 0.3057 0.2799 0.1729 0.081 Uiso 1 1 calc R . . 
C16 C 0.16468(14) -0.0600(4) 0.28058(17) 0.0629(8) Uani 1 1 d . . . 
H16 H 0.1370 -0.1378 0.2927 0.075 Uiso 1 1 calc R . . 
C18 C 0.24095(13) 0.0290(4) 0.20085(17) 0.0632(8) Uani 1 1 d . . . 
H18 H 0.2657 0.0110 0.1601 0.076 Uiso 1 1 calc R . . 
C25 C 0.23156(11) 0.1362(4) 0.52845(19) 0.0617(8) Uani 1 1 d . . . 
H25A H 0.2251 0.1052 0.5803 0.093 Uiso 1 1 calc R . . 
H25B H 0.2437 0.2474 0.5265 0.093 Uiso 1 1 calc R . . 
H25C H 0.2611 0.0685 0.5068 0.093 Uiso 1 1 calc R . . 
C19 C 0.24437(11) 0.1768(3) 0.24072(14) 0.0511(7) Uani 1 1 d . . . 
C23 C 0.05919(12) 0.0471(4) 0.46581(18) 0.0662(8) Uani 1 1 d . . . 
H23A H 0.0478 0.0328 0.5178 0.099 Uiso 1 1 calc R . . 
H23B H 0.0854 -0.0380 0.4515 0.099 Uiso 1 1 calc R . . 
H23C H 0.0255 0.0435 0.4338 0.099 Uiso 1 1 calc R . . 
C5 C 0.15816(13) 0.6917(3) 0.51129(16) 0.0586(7) Uani 1 1 d . . . 
H5 H 0.1454 0.7760 0.5422 0.070 Uiso 1 1 calc R . . 
O48 O 0.40853(6) 0.88381(19) 0.35717(10) 0.0462(4) Uani 1 1 d . . . 
O46 O 0.46717(7) 0.7936(2) 0.45314(11) 0.0604(5) Uani 1 1 d . . . 
C27 C 0.41812(13) 0.5970(4) 0.3831(2) 0.0679(9) Uani 1 1 d U . . 
C30 C 0.52476(11) 0.7776(4) 0.25317(16) 0.0569(7) Uani 1 1 d . . . 
C45 C 0.41398(10) 0.7689(3) 0.41578(16) 0.0525(7) Uani 1 1 d . . . 
C31 C 0.53003(12) 0.9010(4) 0.30533(18) 0.0626(8) Uani 1 1 d . . . 
H31 H 0.5107 0.8918 0.3515 0.075 Uiso 1 1 calc R . . 
C49 C 0.35479(12) 0.8743(3) 0.31703(18) 0.0602(7) Uani 1 1 d . . . 
H49A H 0.3237 0.9039 0.3504 0.090 Uiso 1 1 calc R . . 
H49B H 0.3490 0.7656 0.2992 0.090 Uiso 1 1 calc R . . 
H49C H 0.3556 0.9472 0.2745 0.090 Uiso 1 1 calc R . . 
C29 C 0.49317(13) 0.6317(4) 0.26293(18) 0.0611(8) Uani 1 1 d . . . 
C28 C 0.45246(14) 0.5563(3) 0.3177(2) 0.0699(9) Uani 1 1 d U . . 
C44 C 0.36658(13) 0.8014(6) 0.4761(2) 0.0802(11) Uani 1 1 d . . . 
C47 C 0.47833(14) 0.9510(5) 0.4861(2) 0.0853(11) Uani 1 1 d . . . 
H47A H 0.4626 0.9548 0.5366 0.128 Uiso 1 1 calc R . . 
H47B H 0.4604 1.0333 0.4555 0.128 Uiso 1 1 calc R . . 
H47C H 0.5194 0.9695 0.4881 0.128 Uiso 1 1 calc R . . 
C39 C 0.4470(2) 0.3938(5) 0.2912(4) 0.1057(15) Uani 1 1 d U . . 
C35 C 0.55857(15) 0.7967(5) 0.18363(18) 0.0802(11) Uani 1 1 d . . . 
O50 O 0.35240(11) 0.9399(4) 0.48929(15) 0.1036(9) Uani 1 1 d . . . 
O38 O 0.47614(16) 0.3710(4) 0.2250(2) 0.1242(13) Uani 1 1 d . . . 
C33 C 0.59228(16) 1.0567(6) 0.2247(3) 0.0988(13) Uani 1 1 d . . . 
H33 H 0.6132 1.1510 0.2154 0.119 Uiso 1 1 calc R . . 
C32 C 0.56256(14) 1.0369(5) 0.2919(2) 0.0792(10) Uani 1 1 d . . . 
H32 H 0.5646 1.1173 0.3289 0.095 Uiso 1 1 calc R . . 
C34 C 0.59052(15) 0.9396(7) 0.1737(2) 0.0933(13) Uani 1 1 d . . . 
H34 H 0.6115 0.9524 0.1290 0.112 Uiso 1 1 calc R . . 
C37 C 0.50275(19) 0.5125(5) 0.2081(3) 0.0934(14) Uani 1 1 d . . . 
C41 C 0.38689(16) 0.4761(5) 0.4200(3) 0.1045(15) Uani 1 1 d U . . 
C42 C 0.3530(2) 0.5129(8) 0.4866(4) 0.140(3) Uani 1 1 d U . . 
H42 H 0.3370 0.4253 0.5124 0.168 Uiso 1 1 calc R . . 
C43 C 0.34245(16) 0.6583(9) 0.5146(3) 0.126(2) Uani 1 1 d U . . 
H43 H 0.3200 0.6702 0.5581 0.151 Uiso 1 1 calc R . . 
C1A C 0.5610(2) 0.6748(8) 0.1310(3) 0.1151(16) Uani 1 1 d . . . 
H1A H 0.5813 0.6930 0.0862 0.138 Uiso 1 1 calc R . . 
C1B C 0.4182(3) 0.2780(6) 0.3275(5) 0.154(3) Uani 1 1 d U . . 
H1B H 0.4189 0.1727 0.3086 0.185 Uiso 1 1 calc R . . 
C1C C 0.5357(2) 0.5316(7) 0.1409(3) 0.1074(17) Uani 1 1 d . . . 
H1C H 0.5395 0.4484 0.1056 0.129 Uiso 1 1 calc R . . 
C1D C 0.3874(2) 0.3104(6) 0.3920(5) 0.142(2) Uani 1 1 d U . . 
H1D H 0.3674 0.2288 0.4173 0.171 Uiso 1 1 calc R . . 
 
loop_ 
 _atom_site_aniso_label 
 _atom_site_aniso_U_11 
 _atom_site_aniso_U_22 
 _atom_site_aniso_U_33 
 _atom_site_aniso_U_23 
 _atom_site_aniso_U_13 
 _atom_site_aniso_U_12 
O24 0.0388(8) 0.0441(10) 0.0516(9) 0.0043(8) -0.0020(8) -0.0004(7) 
O22 0.0380(8) 0.0580(11) 0.0506(10) 0.0031(9) -0.0095(8) -0.0096(8) 
C11 0.0327(10) 0.0442(14) 0.0371(12) -0.0002(11) -0.0077(10) 0.0015(9) 
O2 0.0730(13) 0.0501(12) 0.0589(12) 0.0112(10) 0.0050(10) -0.0170(9) 
C13 0.0337(11) 0.0466(14) 0.0369(12) 0.0042(11) -0.0036(10) -0.0018(9) 
O26 0.0680(13) 0.0922(16) 0.0552(12) 0.0307(12) 0.0062(11) 0.0003(11) 
C6 0.0424(13) 0.0526(17) 0.0446(13) -0.0044(12) -0.0110(11) 0.0098(11) 
C14 0.0379(12) 0.0512(15) 0.0354(12) 0.0033(11) -0.0060(10) 0.0013(10) 
C3 0.0546(14) 0.0475(17) 0.0448(14) 0.0076(13) -0.0060(12) -0.0005(12) 
C12 0.0381(11) 0.0376(14) 0.0420(12) 0.0044(11) -0.0086(10) 0.0009(10) 
C10 0.0315(10) 0.0477(15) 0.0416(13) 0.0000(11) -0.0016(10) -0.0023(10) 
C7 0.0456(14) 0.082(2) 0.0469(15) -0.0171(16) -0.0026(13) 0.0172(14) 
C4 0.0801(19) 0.0367(16) 0.0602(17) 0.0014(14) -0.0150(17) -0.0026(13) 
C15 0.0500(14) 0.0561(16) 0.0395(13) 0.0002(12) -0.0014(11) -0.0060(12) 
C21 0.0645(18) 0.085(2) 0.0558(18) 0.0161(18) 0.0128(15) -0.0187(16) 
C9 0.0379(12) 0.076(2) 0.0436(14) 0.0107(15) 0.0001(11) -0.0067(13) 
C17 0.078(2) 0.069(2) 0.0550(17) -0.0169(15) -0.0097(16) 0.0073(17) 
C8 0.0465(15) 0.091(2) 0.0443(15) -0.0035(16) 0.0056(12) 0.0009(15) 
C1 0.0534(15) 0.0540(17) 0.0462(14) 0.0088(14) 0.0007(12) -0.0086(12) 
C20 0.0598(18) 0.097(3) 0.0460(16) 0.0034(17) 0.0143(14) -0.0038(16) 
C16 0.0702(19) 0.0592(19) 0.0592(18) -0.0070(15) -0.0083(15) -0.0106(15) 
C18 0.0567(16) 0.085(2) 0.0479(15) -0.0096(16) -0.0002(14) 0.0153(16) 
C25 0.0399(13) 0.0627(18) 0.083(2) 0.0093(16) -0.0082(14) 0.0036(12) 
C19 0.0448(13) 0.0676(19) 0.0409(14) -0.0026(13) -0.0010(12) 0.0073(12) 
C23 0.0501(14) 0.075(2) 0.074(2) 0.0049(16) -0.0038(14) -0.0286(14) 
C5 0.0721(18) 0.0485(18) 0.0553(17) -0.0101(14) -0.0190(15) 0.0155(14) 
O48 0.0391(9) 0.0438(10) 0.0557(10) 0.0074(8) -0.0070(8) -0.0015(7) 
O46 0.0386(9) 0.0823(14) 0.0604(11) 0.0039(11) -0.0123(9) 0.0062(9) 
C27 0.0495(15) 0.0508(18) 0.103(2) 0.0355(17) -0.0385(16) -0.0123(13) 
C30 0.0388(13) 0.077(2) 0.0549(16) -0.0051(15) -0.0131(13) 0.0157(13) 
C45 0.0348(12) 0.0642(19) 0.0585(16) 0.0185(14) -0.0089(12) -0.0010(11) 
C31 0.0446(14) 0.083(2) 0.0606(18) -0.0101(16) -0.0023(14) -0.0034(14) 
C49 0.0547(15) 0.0567(17) 0.0693(18) 0.0110(15) -0.0216(15) -0.0017(13) 
C29 0.0570(17) 0.0587(18) 0.0675(18) -0.0160(16) -0.0242(15) 0.0268(15) 
C28 0.0622(18) 0.0403(16) 0.107(3) -0.0019(17) -0.0449(19) 0.0110(13) 
C44 0.0417(15) 0.129(3) 0.070(2) 0.042(2) -0.0006(15) 0.0125(18) 
C47 0.0608(18) 0.119(3) 0.076(2) -0.042(2) -0.0133(18) 0.0072(18) 
C39 0.102(3) 0.049(2) 0.166(5) 0.003(3) -0.069(3) 0.007(2) 
C35 0.0617(19) 0.127(3) 0.0516(18) -0.012(2) -0.0196(16) 0.037(2) 
O50 0.0680(15) 0.159(3) 0.0841(17) 0.0126(19) 0.0206(14) 0.0376(17) 
O38 0.134(3) 0.068(2) 0.170(3) -0.049(2) -0.073(3) 0.0401(19) 
C33 0.064(2) 0.140(4) 0.092(3) 0.033(3) -0.013(2) -0.029(2) 
C32 0.0537(17) 0.102(3) 0.081(2) 0.001(2) -0.0052(17) -0.0207(18) 
C34 0.056(2) 0.158(4) 0.067(2) 0.023(3) -0.0064(18) 0.000(2) 
C37 0.090(2) 0.070(3) 0.121(4) -0.036(2) -0.053(3) 0.034(2) 
C41 0.067(2) 0.090(3) 0.157(4) 0.077(3) -0.045(3) -0.0220(19) 
C42 0.063(3) 0.177(6) 0.181(6) 0.142(5) -0.032(3) -0.027(3) 
C43 0.048(2) 0.219(6) 0.111(4) 0.101(5) 0.005(2) 0.010(3) 
C1A 0.091(3) 0.180(5) 0.075(3) -0.024(3) -0.014(2) 0.042(3) 
C1B 0.134(5) 0.057(3) 0.270(8) 0.019(4) -0.112(5) -0.014(3) 
C1C 0.104(3) 0.142(4) 0.076(3) -0.057(3) -0.028(3) 0.066(3) 
C1D 0.102(4) 0.065(3) 0.260(7) 0.086(4) -0.083(4) -0.034(3) 
 
_geom_special_details 
; 
 All esds (except the esd in the dihedral angle between two l.s. planes) 
 are estimated using the full covariance matrix.  The cell esds are taken 
 into account individually in the estimation of esds in distances, angles 
 and torsion angles; correlations between esds in cell parameters are only 
 used when they are defined by crystal symmetry.  An approximate (isotropic) 
 treatment of cell esds is used for estimating esds involving l.s. planes. 
; 
 
loop_ 
 _geom_bond_atom_site_label_1 
 _geom_bond_atom_site_label_2 
 _geom_bond_distance 
 _geom_bond_site_symmetry_2 
 _geom_bond_publ_flag 
O24 C10 1.404(3) . ? 
O24 C25 1.426(3) . ? 
O22 C10 1.404(3) . ? 
O22 C23 1.446(3) . ? 
C11 C6 1.399(3) . ? 
C11 C12 1.415(3) . ? 
C11 C10 1.517(3) . ? 
O2 C3 1.360(3) . ? 
O2 C1 1.365(3) . ? 
C13 C1 1.389(3) . ? 
C13 C14 1.436(3) . ? 
C13 C12 1.490(3) . ? 
O26 C9 1.214(3) . ? 
C6 C5 1.406(4) . ? 
C6 C7 1.462(4) . ? 
C14 C15 1.409(3) . ? 
C14 C19 1.436(3) . ? 
C3 C4 1.360(4) . ? 
C3 C12 1.415(3) . ? 
C10 C9 1.558(4) . ? 
C7 C8 1.319(4) . ? 
C4 C5 1.363(4) . ? 
C15 C16 1.366(4) . ? 
C21 C20 1.347(4) . ? 
C21 C1 1.387(4) . ? 
C9 C8 1.439(4) . ? 
C17 C18 1.358(4) . ? 
C17 C16 1.387(4) . ? 
C20 C19 1.414(4) . ? 
C18 C19 1.409(4) . ? 
O48 C45 1.406(3) . ? 
O48 C49 1.430(3) . ? 
O46 C45 1.408(3) . ? 
O46 C47 1.445(4) . ? 
C27 C41 1.391(5) . ? 
C27 C28 1.438(5) . ? 
C27 C45 1.534(4) . ? 
C30 C31 1.376(4) . ? 
C30 C29 1.418(4) . ? 
C30 C35 1.460(5) . ? 
C45 C44 1.549(4) . ? 
C31 C32 1.370(4) . ? 
C29 C37 1.395(5) . ? 
C29 C28 1.483(5) . ? 
C28 C39 1.424(5) . ? 
C44 O50 1.211(5) . ? 
C44 C43 1.469(6) . ? 
C39 C1B 1.329(8) . ? 
C39 O38 1.357(6) . ? 
C35 C1A 1.369(6) . ? 
C35 C34 1.401(5) . ? 
O38 C37 1.352(6) . ? 
C33 C34 1.320(6) . ? 
C33 C32 1.378(5) . ? 
C37 C1C 1.415(6) . ? 
C41 C42 1.442(8) . ? 
C41 C1D 1.453(8) . ? 
C42 C43 1.319(8) . ? 
C1A C1C 1.329(7) . ? 
C1B C1D 1.366(9) . ? 
 
loop_ 
 _geom_angle_atom_site_label_1 
 _geom_angle_atom_site_label_2 
 _geom_angle_atom_site_label_3 
 _geom_angle 
 _geom_angle_site_symmetry_1 
 _geom_angle_site_symmetry_3 
 _geom_angle_publ_flag 
C10 O24 C25 114.66(19) . . ? 
C10 O22 C23 118.28(19) . . ? 
C6 C11 C12 118.8(2) . . ? 
C6 C11 C10 117.7(2) . . ? 
C12 C11 C10 123.5(2) . . ? 
C3 O2 C1 105.98(19) . . ? 
C1 C13 C14 116.3(2) . . ? 
C1 C13 C12 104.7(2) . . ? 
C14 C13 C12 138.7(2) . . ? 
C11 C6 C5 121.4(2) . . ? 
C11 C6 C7 120.7(2) . . ? 
C5 C6 C7 117.9(2) . . ? 
C15 C14 C13 125.8(2) . . ? 
C15 C14 C19 116.5(2) . . ? 
C13 C14 C19 117.4(2) . . ? 
O2 C3 C4 121.6(2) . . ? 
O2 C3 C12 112.6(2) . . ? 
C4 C3 C12 125.8(3) . . ? 
C11 C12 C3 115.6(2) . . ? 
C11 C12 C13 140.7(2) . . ? 
C3 C12 C13 103.5(2) . . ? 
O24 C10 O22 109.01(18) . . ? 
O24 C10 C11 112.21(17) . . ? 
O22 C10 C11 104.90(18) . . ? 
O24 C10 C9 109.0(2) . . ? 
O22 C10 C9 106.48(17) . . ? 
C11 C10 C9 114.9(2) . . ? 
C8 C7 C6 124.1(3) . . ? 
C3 C4 C5 117.2(3) . . ? 
C16 C15 C14 121.8(3) . . ? 
C20 C21 C1 117.5(3) . . ? 
O26 C9 C8 123.4(3) . . ? 
O26 C9 C10 119.4(3) . . ? 
C8 C9 C10 117.1(2) . . ? 
C18 C17 C16 119.3(3) . . ? 
C7 C8 C9 119.6(3) . . ? 
O2 C1 C21 120.9(2) . . ? 
O2 C1 C13 113.0(2) . . ? 
C21 C1 C13 126.1(3) . . ? 
C21 C20 C19 121.1(3) . . ? 
C15 C16 C17 121.2(3) . . ? 
C17 C18 C19 121.5(3) . . ? 
C18 C19 C20 119.5(3) . . ? 
C18 C19 C14 119.4(2) . . ? 
C20 C19 C14 121.0(3) . . ? 
C4 C5 C6 120.7(3) . . ? 
C45 O48 C49 113.79(19) . . ? 
C45 O46 C47 118.2(2) . . ? 
C41 C27 C28 119.5(4) . . ? 
C41 C27 C45 117.1(4) . . ? 
C28 C27 C45 123.4(2) . . ? 
C31 C30 C29 126.3(3) . . ? 
C31 C30 C35 115.6(3) . . ? 
C29 C30 C35 117.9(3) . . ? 
O48 C45 O46 108.9(2) . . ? 
O48 C45 C27 110.7(2) . . ? 
O46 C45 C27 104.8(2) . . ? 
O48 C45 C44 108.9(2) . . ? 
O46 C45 C44 105.7(2) . . ? 
C27 C45 C44 117.5(3) . . ? 
C32 C31 C30 122.6(3) . . ? 
C37 C29 C30 115.7(4) . . ? 
C37 C29 C28 104.7(3) . . ? 
C30 C29 C28 139.5(3) . . ? 
C39 C28 C27 115.7(4) . . ? 
C39 C28 C29 103.7(4) . . ? 
C27 C28 C29 140.5(3) . . ? 
O50 C44 C43 124.5(4) . . ? 
O50 C44 C45 119.0(3) . . ? 
C43 C44 C45 116.4(4) . . ? 
C1B C39 O38 124.2(5) . . ? 
C1B C39 C28 124.3(6) . . ? 
O38 C39 C28 111.6(4) . . ? 
C1A C35 C34 120.8(4) . . ? 
C1A C35 C30 120.7(4) . . ? 
C34 C35 C30 118.5(3) . . ? 
C37 O38 C39 107.1(3) . . ? 
C34 C33 C32 118.8(4) . . ? 
C31 C32 C33 121.2(4) . . ? 
C33 C34 C35 123.1(4) . . ? 
O38 C37 C29 112.6(4) . . ? 
O38 C37 C1C 121.7(4) . . ? 
C29 C37 C1C 125.8(4) . . ? 
C27 C41 C42 120.7(5) . . ? 
C27 C41 C1D 120.8(5) . . ? 
C42 C41 C1D 118.5(5) . . ? 
C43 C42 C41 126.5(4) . . ? 
C42 C43 C44 119.2(5) . . ? 
C1C C1A C35 123.1(5) . . ? 
C39 C1B C1D 121.3(6) . . ? 
C1A C1C C37 116.4(4) . . ? 
C1B C1D C41 118.0(5) . . ? 
 
_diffrn_measured_fraction_theta_max    1.000 
_diffrn_reflns_theta_full              29.03 
_diffrn_measured_fraction_theta_full   1.000
_refine_diff_density_max    0.174 
_refine_diff_density_min   -0.171 
_refine_diff_density_rms    0.031 
